# Supplementary material for: Genome-Wide Discovery of miRNAs with Differential Expression Patterns in Responses to Salinity in the Two Contrasting Wheat Cultivars
Source: MDPI journal article supplement (doi:10.3390/ijms222212556), 2021-11-21
Supplement: s1 [file s1]

## Supplemental Material

# Genome-wide discovery of miRNAs with differential expression patterns in responses to salinity in the two contrasting wheat cultivars

Muhammad Zeeshan<sup>1</sup>, Cheng-Wei Qiu<sup>1</sup>, Shama Naz<sup>1</sup>, Cao Fangbin<sup>1\*</sup>, Wu Feibo<sup>1,2\*</sup>

<sup>1</sup>Department of Agronomy, College of Agriculture and Biotechnology, Zijingang Campus, Zhejiang University, Hangzhou 310058, P.R. China 11616102@zju.edu.cn (M.Z.); 3130100260@zju.edu.cn (C.Q.); shamaktk@yahoo.com (S.N.); wufeibo@zju.edu.cn (W.F.)

<sup>2</sup>Jiangsu Co-Innovation Center for Modern Production Technology of Grain Crops, Yangzhou University, Yangzhou 225009, China

\*Corresponding author: wufeibo@zju.edu.cn; Tel./Fax: +86 571 88982827

**Table S1. Description, expression and putative target genes of known and novel miRNAs in roots whose expression were significantly down-regulated or up-regulated in of both Suntop (ST), and Sunmate (SM) treated with 100 mM NaCl for 1 day.**

| Family name | miRNA name                  | Sequence                | Length (nt) | Fold change <sup>[1]</sup> |       | Target gene          | Annotation                                   |
|-------------|-----------------------------|-------------------------|-------------|----------------------------|-------|----------------------|----------------------------------------------|
|             |                             |                         |             | ST                         | SM    |                      |                                              |
| MIR156      | tae-miR156                  | UGACAGAAGAGAGUGAGCACACA | 21          | -1.28                      | -0.73 | TraesCS2A01G350100.1 | Nitrate transporter 1.2                      |
|             |                             |                         |             |                            |       | TraesCS2B01G368600.1 |                                              |
|             |                             |                         |             |                            |       | TraesCS2B01G368600.2 |                                              |
|             |                             |                         |             |                            |       | TraesCS2D01G348500.1 | protein NRT1/ PTR FAMILY 4.6-like isoform X1 |
|             |                             |                         |             |                            |       | TraesCS2D01G348500.2 |                                              |
|             |                             |                         |             |                            |       | TraesCS2D01G348500.3 |                                              |
|             |                             |                         |             |                            |       | TraesCS6A01G110100.2 | squamosa promoter-binding-like               |
|             |                             |                         |             |                            |       | TraesCS6B01G138400.1 | protein 3                                    |
|             |                             |                         |             |                            |       | TraesCS6D01G098500.1 |                                              |
| MIR159      | tae-miR159a,<br>tae-miR159b | UUUGGAUUGAAGGGAGCUCUG   | 21          | -0.39                      | 1.93  | TraesCS6D01G145200.1 | squamosa promoter-binding-like protein 4     |
|             |                             |                         |             |                            |       | TraesCS3A01G131700.1 | protein SPEAR2                               |
|             |                             |                         |             |                            |       | TraesCS3A01G131700.3 |                                              |
|             |                             |                         |             |                            |       | TraesCS3D01G147900.1 |                                              |
|             |                             |                         |             |                            |       | TraesCS3D01G147900.2 | transcription factor GAMYB                   |
|             |                             |                         |             |                            |       | TraesCS3A01G336500.1 |                                              |
|             |                             |                         |             |                            |       | TraesCS3D01G329400.1 |                                              |
|             |                             |                         |             |                            |       | TraesCS3D01G329400.2 | R2R3-MYB protein                             |
|             |                             |                         |             |                            |       | TraesCS3D01G329400.3 |                                              |
| MIR160      | tae-miR160                  | UGCCUGGCUCCCUGUAUGCCA   | 21          | -1.58                      | 1.42  | TraesCS3B01G367500.1 |                                              |
|             |                             |                         |             |                            |       | TraesCS3B01G367500.2 |                                              |
|             |                             |                         |             |                            |       | TraesCS2A01G380300.1 | auxin response factor 8-like                 |

| Family name | miRNA name  | Sequence               | Length (nt) | Fold change <sup>[1]</sup> |       | Target gene          | Annotation                                             |
|-------------|-------------|------------------------|-------------|----------------------------|-------|----------------------|--------------------------------------------------------|
|             |             |                        |             | ST                         | SM    |                      |                                                        |
| MIR167      | tae-miR167a | UGAAGCUGCCAGCAUGAUCUA  | 21          | -0.82                      | 1.62  | TraesCS2B01G397300.1 | protein FIZZY-RELATED 2-like                           |
|             |             |                        |             |                            |       | TraesCS4B01G346200.1 |                                                        |
|             |             |                        |             |                            |       | TraesCS4B01G346200.2 |                                                        |
|             |             |                        |             |                            |       | TraesCS4D01G341200.1 |                                                        |
| MIR171      | tae-miR171a | UGAAGCUGCCAGCAUGAUCUGC | 21          | -2.46                      | 1.46  | TraesCS3B01G253400.1 | hypothetical protein TRIUR3_14845                      |
|             |             |                        |             |                            |       | TraesCS3D01G275100.2 |                                                        |
|             |             |                        |             |                            |       | TraesCS1A01G209400.1 |                                                        |
|             |             |                        |             |                            |       | TraesCS1B01G223400.1 |                                                        |
|             | tae-miR171b | UUGAGCCGUGCCAAUAUCACG  | 21          | -1.03                      | -0.89 | TraesCS1D01G212800.1 | scarecrow-like protein 6                               |
|             |             |                        |             |                            |       | TraesCS6A01G247200.1 |                                                        |
|             |             |                        |             |                            |       | TraesCS6B01G277400.1 |                                                        |
|             |             |                        |             |                            |       | TraesCS6D01G229400.1 |                                                        |
|             | tae-miR319  | UUGGACUGAAGGGAGCUCCCU  | 21          | -0.21                      | -2.97 | TraesCS2A01G352600.1 | 6,7-dimethyl-8-ribityllumazine synthase, chloroplastic |
|             |             |                        |             |                            |       | TraesCS2B01G371700.1 |                                                        |
|             |             |                        |             |                            |       | TraesCS2D01G351600.1 |                                                        |
|             |             |                        |             |                            |       | TraesCS3D01G146900.1 |                                                        |
| MIR395      | tae-miR395a | GUGAAGUGUUUGGGGGAACUC  | 21          | -0.45                      | 3.49  | TraesCS3A01G140100.1 | transcription factor PCF5-like                         |
|             |             |                        |             |                            |       | TraesCS7A01G176600.1 |                                                        |
|             |             |                        |             |                            |       | TraesCS7B01G081600.2 |                                                        |
|             |             |                        |             |                            |       | TraesCS7D01G177900.1 |                                                        |
|             | tae-miR395b | UGAAGUGUUUGGGGGAACUC   | 20          | -1.29                      | -0.16 | TraesCS5B01G387300.1 | ATP sulfurylase 4, chloroplastic-like                  |
|             |             |                        |             |                            |       | TraesCS5D01G392300.1 |                                                        |
|             |             |                        |             |                            |       | TraesCS5A01G382900.1 | ATP sulfurylase                                        |

| Family name | miRNA name      | Sequence                 | Length (nt) | Fold change <sup>[1]</sup> |       | Target gene                                                                                                                                  | Annotation                                                                                   |
|-------------|-----------------|--------------------------|-------------|----------------------------|-------|----------------------------------------------------------------------------------------------------------------------------------------------|----------------------------------------------------------------------------------------------|
|             |                 |                          |             | ST                         | SM    |                                                                                                                                              |                                                                                              |
| MIR397      | tae-miR397-5p   | UCACCGGCGCUGCACACAAUG    | 21          | 1.76                       | -0.69 | TraesCS7A01G047900.1                                                                                                                         | probable protein phosphatase 2C 37                                                           |
| MIR398      | tae-miR398      | UGUGUUCUCAGGUCGCCCCCG    | 21          | -1.8                       | -1.2  |                                                                                                                                              |                                                                                              |
| undef       | tae-miR1117     | UAGUACCGGUUCGUGGCACGAACC | 24          | -0.32                      | -1.47 |                                                                                                                                              |                                                                                              |
| undef       | tae-miR1125     | AACCAACGAGACCAACUGCGGCGG | 24          | 0.28                       | -2.41 |                                                                                                                                              |                                                                                              |
| MIR818      | tae-miR1130b-3p | UCUUAUAUUAUGGGACGGAGG    | 21          | -0.22                      | 1.09  | TraesCS2D01G248200.6                                                                                                                         | probable inactive leucine rich repeat receptor-like protein kinase At3g03770 isoform X2      |
|             | tae-miR1137a    | UAGUACAAAGUUGAGUCAUC     | 20          | 0.25                       | -1.53 | TraesCS6A01G107500.1<br>TraesCS6B01G136100.1<br>TraesCS6B01G136200.1<br>TraesCS2A01G366400.1<br>TraesCS2A01G366400.2                         | unnamed protein product<br>hypothetical protein OsI_25001<br>hypothetical protein F775_04208 |
| Undef       | tae-miR5048-5p  | UUUGCAGGUUUUAGGUCUAAGU   | 22          | -0.72                      | 1.24  | TraesCS3A01G521100.1<br>TraesCS3A01G521100.2<br>TraesCS4B01G313900.2<br>TraesCS4B01G313900.3<br>TraesCS1B01G119300.3<br>TraesCS7D01G487800.1 | uncharacterized protein<br>LOC109783670<br>starch synthase III<br>GDSL esterase/lipase       |
| MIR5062     | tae-miR5062-5p  | UGAACCUUAGGGAACAGCCGCAU  | 23          | -0.77                      | 1.34  |                                                                                                                                              |                                                                                              |
| MIR5067     | tae-miR5175-5p  | UUCCAAUUAUCUCGUCGUGGU    | 21          | -0.32                      | 1.4   | TraesCS2A01G485700.2                                                                                                                         | receptor-like serine/ threonine - protein kinase SD1-8                                       |
| MIR5200     | tae-miR5200     | UGUAGAUACUCCCUAAGGCUU    | 21          | -0.09                      | 1.2   | TraesCS5D01G072900.1                                                                                                                         | hypothetical protein F775_12042                                                              |
| MIR7757     | tae-miR7757-5p  | AUAAAACCUUCAGCUAUCCAUC   | 22          | -1.1                       | 1.78  | TraesCS2A01G023400.1<br>TraesCS2B01G033500.1                                                                                                 | putative disease resistance protein<br>At1g50180                                             |

| Family name | miRNA name                          | Sequence               | Length (nt) | Fold change <sup>[1]</sup> |      | Target gene          | Annotation                         |
|-------------|-------------------------------------|------------------------|-------------|----------------------------|------|----------------------|------------------------------------|
|             |                                     |                        |             | ST                         | SM   |                      |                                    |
| MIR9652     | tae-miR9652-3p                      | AAGCUUAAUGAGAACAUUGUG  | 20          | 1.24                       | 0    | TraesCS2D01G024500.1 | protein argonaute MEL1             |
|             |                                     |                        |             |                            |      | TraesCS2D01G024500.2 |                                    |
|             | tae-miR9652-5p                      | CCUGUUUGUCAUUAAGUUUCUU | 22          | -0.54                      | 1.41 | TraesCS3B01G287600.2 |                                    |
|             |                                     |                        |             |                            |      | TraesCS5B01G451400.1 |                                    |
| Undef       | tae-miR9653b                        | UGGCCAAGGUCUCUUGAGGCU  | 21          | -1.07                      | 1.8  | TraesCS5B01G452500.1 | probable protein phosphatase 2C 48 |
|             |                                     |                        |             |                            |      | TraesCS1A01G228200.1 |                                    |
|             | tae-miR9654b-3p                     | UCCGAAAGGCUUGAAGCGAAU  | 22          | -0.9                       | 2.18 | TraesCS1A01G228200.2 |                                    |
|             |                                     |                        |             |                            |      |                      |                                    |
| Undef       | tae-miR9656-3p                      | CUUCGAGACUCUGAACAGCGG  | 21          | -0.17                      | 1.72 |                      |                                    |
| MIR9657     | tae-miR9657a-3p                     | UGUGCUUCCUCGUCGAACGGU  | 21          | -0.31                      | 1.27 | TraesCS3B01G280400.1 | WD-40 repeat-containing protein    |
|             |                                     |                        |             |                            |      | TraesCS3D01G251300.1 | MSI4 isoforms                      |
|             |                                     |                        |             |                            |      | TraesCS3A01G250900.2 |                                    |
|             |                                     |                        |             |                            |      | TraesCS7B01G144300.1 | MYB-related protein                |
|             |                                     |                        |             |                            |      | TraesCS7B01G006500.1 | putative serpin-Z5                 |
|             |                                     |                        |             |                            |      | TraesCS7D01G103400.1 |                                    |
|             | tae-miR9657c-3p,<br>tae-miR9657b-3p | CGUGCUUCCUCGUCGAACGGU  | 21          | -0.38                      | 1.16 | TraesCS3A01G250900.3 | FVE [Triticum aestivum]            |
|             |                                     |                        |             |                            |      | TraesCS3A01G250900.1 |                                    |
|             |                                     |                        |             |                            |      | TraesCS3B01G280400.1 | WD-40 repeat-containing protein    |
|             |                                     |                        |             |                            |      | TraesCS3D01G251300.1 | MSI4 isoforms                      |
|             |                                     |                        |             |                            |      | TraesCS3A01G250900.2 |                                    |
|             |                                     |                        |             |                            |      | TraesCS7B01G006500.1 | putative serpin-Z5                 |
|             |                                     |                        |             |                            |      | TraesCS7D01G103400.1 |                                    |
|             |                                     |                        |             |                            |      | TraesCS7B01G144300.1 | MYB-related protein                |

| Family name | miRNA name      | Sequence              | Length (nt) | Fold change <sup>[1]</sup> |       | Target gene          | Annotation                                                  |
|-------------|-----------------|-----------------------|-------------|----------------------------|-------|----------------------|-------------------------------------------------------------|
|             |                 |                       |             | ST                         | SM    |                      |                                                             |
|             |                 |                       |             |                            |       | TraesCS3A01G250900.1 | FVE [Triticum aestivum]                                     |
|             |                 |                       |             |                            |       | TraesCS3A01G250900.3 |                                                             |
| undef       | tae-miR9658-3p  | AUCGUUCUGGGUGAAUAGGCC | 21          | -0.25                      | -2.03 |                      |                                                             |
| MIR9662     | tae-miR9662a-3p | UUGAACAUCCCAGAGCCACCG | 21          | 1.12                       | 1.19  | TraesCS4B01G290700.1 | transcription termination factor MTERF9, chloroplastic-like |
|             |                 |                       |             |                            |       | TraesCS5D01G030400.1 | transcription termination factor MTEF18, mitochondrial-like |
|             |                 |                       |             |                            |       | TraesCS6A01G015200.1 | transcription termination factor                            |
|             |                 |                       |             |                            |       | TraesCS6D01G036200.1 | MTERF15, mitochondrial-like                                 |
|             |                 |                       |             |                            |       | TraesCS6B01G025600.1 | transcription termination factor MTERF4, chloroplastic-like |
|             |                 |                       |             |                            |       | TraesCS6B01G059500.1 | transcription termination factor                            |
|             |                 |                       |             |                            |       | TraesCS6B01G059600.1 | MTERF8, chloroplastic-like                                  |
|             |                 |                       |             |                            |       | TraesCS7B01G292800.1 | GDSL esterase/lipase At3g09930-like                         |
|             | tae-miR9662b-3p | UGAACAUCCCAGAGCCACCGG | 21          | -0.09                      | 1.45  | TraesCS6B01G021800.1 | Uncharacterized protein                                     |
|             |                 |                       |             |                            |       | TraesCS6B01G043100.1 | LOC109765037                                                |
|             |                 |                       |             |                            |       | TraesCS6D01G035100.1 | cytosolic sulfotransferase 5-like                           |
| undef       | tae-miR9664-3p  | UUGCAGUCCUCGAUGUCGUAG | 21          | -0.64                      | 1.04  | TraesCS3A01G247700.1 | cyclin dependent protein kinase                             |
|             |                 |                       |             |                            |       | TraesCS7D01G096000.1 | disease resistance protein                                  |
|             |                 |                       |             |                            |       | TraesCS5D01G405600.1 |                                                             |
|             |                 |                       |             |                            |       | TraesCS2D01G541000.1 |                                                             |
|             |                 |                       |             |                            |       | TraesCS2D01G025700.1 |                                                             |
|             |                 |                       |             |                            |       | TraesCS2D01G025700.2 |                                                             |

| Family name | miRNA name       | Sequence                | Length (nt) | Fold change <sup>[1]</sup> |       | Target gene          | Annotation                                   |
|-------------|------------------|-------------------------|-------------|----------------------------|-------|----------------------|----------------------------------------------|
|             |                  |                         |             | ST                         | SM    |                      |                                              |
|             |                  |                         |             |                            |       | TraesCS2D01G025700.3 |                                              |
| MIR9666     | tae-miR9666a-3p  | CGGUAGGGCUGUAUGAUGGCGA  | 22          | -1.71                      | -0.69 | TraesCS5B01G438300.1 | BTB/POZ and MATH domain-containing protein 3 |
|             | tae-miR9666b-3p  | CGGUUGGGCUGUAUGAUGGCGA  |             | -2.18                      | -1.13 |                      |                                              |
|             | tae-miR9666c-5p, | GCCAUCAUACGUCCAACCGUG   | 21          | -2.43                      | -0.69 | TraesCS2B01G562600.1 | exocyst complex component                    |
|             | tae-miR9666b-5p  |                         |             |                            |       |                      | EXO70A1-like                                 |
| undef       | tae-miR9668-5p   | CCAAUGACAAGUAUUUUCGGA   | 21          | -0.28                      | 1.75  | TraesCS6B01G070200.1 | disease resistance protein RGA2-like         |
| undef       | tae-miR9669-5p   | UACUGUGGGCACUUAUUUGAC   | 21          | -0.72                      | 2.13  |                      |                                              |
| MIR9672     | tae-miR9672a-3p  | CCACGACUGUCAUUAAGCAUC   | 21          | 0.65                       | -1.02 |                      |                                              |
|             | tae-miR9672b     | UACCACGACUGUCAUUAAGCA   | 21          | -1.12                      | -0.57 | TraesCS7D01G383200.1 | replication factor C subunit 1               |
| MIR9674     | tae-miR9674b-5p  | AUAGCAUCAUCCAUCCUACCC   | 21          | -0.08                      | 1.48  | TraesCS2A01G531000.1 | protein Rf1, mitochondrial-like              |
|             |                  |                         |             |                            |       | TraesCS6A01G014800.1 |                                              |
|             |                  |                         |             |                            |       | TraesCS6B01G021600.1 |                                              |
|             |                  |                         |             |                            |       | TraesCS6D01G017700.1 |                                              |
| undef       | tae-miR9675-3p   | UUUAUGAUCACUCUCGUUUUG   | 21          | -0.21                      | 2.48  | TraesCS3A01G074300.1 | premnaspirodiene oxygenase like              |
| MIR9772     | tae-miR9772      | UGAGAUGAGAUUACCCCAUAC   | 21          | -0.58                      | 1.7   | TraesCS6A01G063700.1 | F-box protein At5g03970 like                 |
|             |                  |                         |             |                            |       | TraesCS6B01G085300.1 |                                              |
|             |                  |                         |             |                            |       | TraesCS6B01G085300.2 |                                              |
|             |                  |                         |             |                            |       | TraesCS6D01G061100.1 |                                              |
|             |                  |                         |             |                            |       | TraesCS7D01G005400.1 | F-box/kelch-repeat protein                   |
|             |                  |                         |             |                            |       | TraesCS6A01G058900.1 | At3g61590-like                               |
| undef       | tae-miR9773      | UUUGUUUUUAUGUUAUUUUGUGA | 23          | -0.39                      | 2.63  |                      |                                              |

| Family name | miRNA name  | Sequence                           | Length (nt) | Fold change <sup>[1]</sup> |       | Target gene          | Annotation                        |
|-------------|-------------|------------------------------------|-------------|----------------------------|-------|----------------------|-----------------------------------|
|             |             |                                    |             | ST                         | SM    |                      |                                   |
| Undef       | tae-miR9774 | CAAGAUAUUGGGUAAUUCUGUC             | 22          | -1.09                      | -2.13 |                      |                                   |
| Undef       | tae-miR9775 | UGUGCGCAAUAAGAUUUUGCUA             | 22          | 0.46                       | 1.97  | TraesCS7D01G005400.1 | F-box/kelch-repeat protein SKIP11 |
| Undef       | tae-miR9778 | UGCAUCAUCUCGAACUCGUCG              | 21          | -0.62                      | -2    | TraesCS1A01G021700.1 | Disease resistance protein RPM1   |
|             |             |                                    |             |                            |       | TraesCS1A01G021800.1 |                                   |
|             |             |                                    |             |                            |       | TraesCS1A01G021800.2 |                                   |
|             |             |                                    |             |                            |       | TraesCS1B01G025500.1 |                                   |
|             |             |                                    |             |                            |       | TraesCS1B01G027000.1 |                                   |
|             |             |                                    |             |                            |       | TraesCS1B01G027500.1 |                                   |
|             |             |                                    |             |                            |       | TraesCS1B01G027500.2 |                                   |
|             | novel_mir3  | AUUGUAGUCUGGAGAGGCGUCCUCA<br>GCGAC | 30          | 1.26                       | 1.54  |                      |                                   |
|             | novel_mir8  | UCCCGGCCCCGAACCUGUCGGCU            | 23          | -0.37                      | 1.17  | TraesCS6A01G114800.1 | premnaspirodien oxygenase-like    |
|             |             |                                    |             |                            |       | TraesCS6B01G142400.1 |                                   |
|             | novel_mir9  | UUUGAAGACUAGUUUAUUAUUAU            | 22          | -0.36                      | -2    |                      |                                   |
|             | novel_mir11 | ACGCAUCAUUCAAAUUUCUGCCCUA<br>UCA   | 28          | -0.23                      | -1.42 |                      |                                   |
|             | novel_mir13 | CCAUGGCCAAGGUCUCUUGAGGC            | 23          | -2                         | -1.34 |                      |                                   |
|             | novel_mir14 | AGAGAUCCCGCGCGCUACUCCGUCGA         | 26          | -1.53                      | -0.49 |                      |                                   |
|             | novel_mir16 | CUUGAAGACUUUGGCCACGUCCAU           | 24          | -1.69                      | -0.68 |                      |                                   |
|             | novel_mir17 | ACCUUUGAGACUUUGGCCAUGGCCA          | 25          | -1.83                      | -0.94 |                      |                                   |
|             | novel_mir18 | UUGAAGACUUUGGCCAUGUCCAUGG<br>UG    | 27          | -1.34                      | -0.99 |                      |                                   |
|             | novel_mir19 | UCCACAGUGCAAAUUUAAAUUUUA<br>UUAGA  | 30          | -0.45                      | -1.01 |                      |                                   |



| Family name | miRNA name  | Sequence                           | Length (nt) | Fold change <sup>[1]</sup> |       | Target gene          | Annotation                                       |
|-------------|-------------|------------------------------------|-------------|----------------------------|-------|----------------------|--------------------------------------------------|
|             |             |                                    |             | ST                         | SM    |                      |                                                  |
|             | novel_mir23 | AGCACCGUUGGCAUCAUCGUCGGCG<br>UUGUC | 30          | -0.57                      | -1.16 |                      |                                                  |
|             | novel_mir24 | AUGGGCUACGUGUGUUAAC                | 20          | -2.34                      | -0.69 |                      |                                                  |
|             | novel_mir25 | UUGGGUUCGAGCCCCAAGGUGGG            | 23          | 1.69                       | 0.98  |                      |                                                  |
|             | novel_mir26 | AGCACCGUUGGCAUCAUUGUCGGCGUU<br>GUU |             | -0.47                      | -1.25 |                      |                                                  |
|             | novel_mir27 | CGCCUUGGGGCCCCGAACCCAAGACCA        | 26          | -1.91                      | -2.22 |                      |                                                  |
|             | novel_mir28 | ACUGGUUGGAUCAUGCUUCUGUUUA<br>UGA   | 28          | -0.87                      | 1.38  | TraesCS1D01G090600.1 | putative disease resistance RPP13-like protein 3 |
|             |             |                                    |             |                            |       | TraesCS6B01G387200.1 | Disease resistance protein RPM1                  |
|             | novel_mir29 | AGUUCGAGUCGGAGGCCACGGUGCU<br>GGG   | 28          | -0.33                      | -1.47 |                      |                                                  |
|             | novel_mir30 | UUGUUUGGCCAUCAAGAACAAGU<br>AG      | 27          | -0.36                      | -1.32 |                      |                                                  |
|             | novel_mir31 | AUCGAGAAAUUGGAGCUCGGUGCAG<br>GCAUA | 30          | -0.62                      | -1.39 |                      |                                                  |
|             | novel_mir32 | UGUUUGGUGCGGACUCUGGACCU            | 23          | -1.23                      | -0.96 |                      |                                                  |
|             | novel_mir33 | AAGAACAUCUAAGGGGCUGAGUUG           | 24          | -1.56                      | -0.23 |                      |                                                  |
|             | novel_mir34 | AAAUGAUGUGUUGUGGAAAGCA             | 23          | -1.91                      | 1.84  |                      |                                                  |
|             | novel_mir36 | UUGGCGAUAGCGAAUGCAGUUCUC           | 24          | -2.31                      | -0.16 |                      |                                                  |
|             | novel_mir37 | AAGUUGCGUAGUGGAUCGCUUGGGG<br>CCUA  | 29          | -0.78                      | -1.18 |                      |                                                  |
|             | novel_mir39 | GACGGAAGGAUUUGGCGGGACCG            | 23          | -4.09                      | -3.07 |                      |                                                  |

| Family name | miRNA name  | Sequence                           | Length (nt) | Fold change <sup>[1]</sup> |       | Target gene          | Annotation                             |
|-------------|-------------|------------------------------------|-------------|----------------------------|-------|----------------------|----------------------------------------|
|             |             |                                    |             | ST                         | SM    |                      |                                        |
|             | novel_mir40 | GUGCACCCGUGUUCACCUUUGUAUU<br>U     | 26          | -0.28                      | 1.93  |                      |                                        |
|             | novel_mir42 | UUGAACCUUGGGGAAAAGCCGCAUA          | 25          | -0.89                      | 1.42  |                      |                                        |
|             | novel_mir45 | UGAUUAACGGCCAGGAUUUCCCUG           | 24          | -0.13                      | 1.12  |                      |                                        |
|             | novel_mir46 | GCGGCGACGGGGGCGGCUU                | 19          | 3.21                       | -1.39 |                      |                                        |
|             | novel_mir47 | GCGAGAGCGGGUCGCCGCGUGCCG           | 24          | -1.35                      | -1.75 | TraesCS4B01G303700.1 | hypoth protein TRIUR306439             |
|             | novel_mir48 | AUGGAUCUGACGGCUGUAGAGGA            | 23          | -0.43                      | 1.16  |                      |                                        |
|             | novel_mir49 | GUGAUUAACGGCCAGGAUUUCCCUG          | 26          | -2.18                      | 1.69  |                      |                                        |
|             | novel_mir51 | GAUGAUAUUAUAUUAUCACUCUGA<br>GGGA   | 29          | -1.21                      | -1.58 |                      |                                        |
|             | novel_mir52 | CCCGUGGAACUUUCUUUUUGAAAA           | 24          | -9.75                      | -8.5  |                      |                                        |
|             | novel_mir53 | CCGGAUGUGUUGUCUUCCUCGACCA<br>UGGUG | 30          | -0.01                      | -1.3  |                      |                                        |
|             | novel_mir54 | UUUGGGGGAUCGAAGAUGAUUAAA           | 24          | -2.91                      | -2.77 |                      |                                        |
|             | novel_mir55 | GGUGGUUGCUGGCGCGCGCGU              | 21          | -4.71                      | -4.94 | TraesCS1A01G049600.2 | ABC transporter G family member 5-like |
|             |             |                                    |             |                            |       | TraesCS1A01G276200.1 | Glucanendo-1,3-beta-glucosidase 14     |
|             | novel_mir56 | GGCCGCUGCACUCCUUGGCCGCUUGG<br>GC   | 28          | -2.1                       | -0.85 |                      |                                        |
|             | novel_mir57 | UGGGCCUCACGGUCCAUAU                | 20          | -0.17                      | -1.12 | TraesCS2D01G386500.1 | Formin-like protein 3                  |
|             |             |                                    |             |                            |       | TraesCS6B01G142400.1 |                                        |
|             |             |                                    |             |                            |       | TraesCS5B01G183100.1 |                                        |
|             |             |                                    |             |                            |       | TraesCS5D01G190100.1 | UDP-glycosyltransferase 90A1-like      |

| Family name | miRNA name  | Sequence                           | Length (nt) | Fold change <sup>[1]</sup> |       | Target gene                                                          | Annotation                                                   |
|-------------|-------------|------------------------------------|-------------|----------------------------|-------|----------------------------------------------------------------------|--------------------------------------------------------------|
|             |             |                                    |             | ST                         | SM    |                                                                      |                                                              |
|             | novel_mir58 | CGAAGCGGCGCUCGGCCCCCGG             | 21          | -0.56                      | -1.81 | TraesCS4B01G062900.1<br>TraesCS4D01G061900.1<br>TraesCS6A01G026800.1 | polyol transporter 5-like<br>3-ketoacyl-CoA synthase 12-like |
|             | novel_mir59 | AUAUUUGCAGGUUUUAGGUCUAAGU<br>GA    | 27          | -0.27                      | 1.54  | TraesCS6B01G465600.1<br>TraesCS6B01G465600.2                         | CBL-interacting serine/threonine-<br>protein kinase 7-like   |
|             | novel_mir60 | GUGCUAGAUCACGCCCGCCGUUCAG<br>UGUUG | 30          | -2.32                      | -0.65 |                                                                      |                                                              |
|             | novel_mir61 | AACGGCCAGGAUUCGUCUGAU              | 21          | -1.29                      | 0.13  | TraesCS4A01G480100.1                                                 | putative disease resistance RPP13-<br>like protein 1         |
|             | novel_mir63 | GUCGAUUAGUUUUAGCUUCAAGCCA<br>UGCUA | 30          | -2.31                      | -2.24 |                                                                      |                                                              |
|             | novel_mir64 | ACACUACGCGUGGAUGAGCA               | 20          | -3.24                      | -0.91 |                                                                      |                                                              |
|             | novel_mir65 | CAGAGCAGCGACAACUGCCCGCUUCCA        |             | -1.6                       | -2.05 |                                                                      |                                                              |
|             | novel_mir66 | UCUAGAGGAUGCAGUCUUUCCUCAA<br>GG    | 27          | -0.79                      | -2.2  |                                                                      |                                                              |
|             | novel_mir68 | GACCGUACCCCAAACCGACA               | 20          | 0.34                       | -1.53 |                                                                      |                                                              |
|             | novel_mir69 | CCCAGUAAACGGCGGCAGAGU              | 21          | 0                          | 5.36  | TraesCS7B01G138500.1                                                 | RNA pseudouridine synthase 3,<br>mitochondrial               |
|             | novel_mir71 | UGUGGCUUGUGGCUAAAACUAGUCU<br>G     | 26          | -1.64                      | -1.2  |                                                                      |                                                              |
|             | novel_mir75 | CCAUCGUCGGCACGGCCGGUACCCAC<br>GCG  | 29          | 1.19                       | -4.75 | TraesCS5A01G555600.1<br>TraesCS7D01G119200.1<br>TraesCS5D01G023700.1 | hypothetical protein<br>MTR_0021s0160                        |

| Family<br>name | miRNA name  | Sequence                         | Length<br>(nt) | Fold change <sup>[1]</sup> |       | Target gene | Annotation |
|----------------|-------------|----------------------------------|----------------|----------------------------|-------|-------------|------------|
|                |             |                                  |                | ST                         | SM    |             |            |
|                | novel_mir78 | GGCGAGAGCGGGUCGCCGCGUGCCG<br>GCC | 28             | -2.68                      | -2.04 |             |            |

**Table S2. Evolutionary conservation of known miRNA families in other plant species**  
“+” sign indicates the existence of miRNA in species, and “-” sign shows no homology in plant species

| miRNA family | <i>Solanum lycopersicum</i> | <i>Solanum tuberosum</i> | <i>Arabidopsis thaliana</i> | <i>Pinus taeda</i> | <i>Physcomitrella patens</i> | <i>Medicago truncatula</i> | <i>Glycine max</i> | <i>Gossypium hirsutum</i> | <i>Populus trichocarpa</i> | <i>Brassica napus</i> | <i>Vitis vinifera</i> | <i>Citrus sinensis</i> | <i>Malus domestica</i> | <i>Cucumis melo</i> | <i>Zea mays</i> | <i>Oryza sativa</i> | <i>Sorghum bicolor</i> | <i>Triticum aestivum</i> | <i>Aegilops tauschii</i> | <i>Triticum turgidum</i> | <i>Ricinus communis</i> | <i>Hordeum vulgare</i> | <i>Saccharum officinarum</i> | <i>Vigna unguiculata</i> | <i>Digitalis purpurea</i> | <i>Linum usitatissimum</i> | <i>Manihot esculenta</i> | <i>Prunus persica</i> | <i>Carica papaya</i> | <i>Cynara cardunculus</i> | <i>Theobroma cacao</i> | <i>Brachypodium distachyon</i> | <i>Salvia sclarea</i> | <i>Selaginella moellendorffii</i> | <i>Aquilegia caerulea</i> | <i>Festuca arundinacea</i> | <i>Hevea brasiliensis</i> | Total |    |
|--------------|-----------------------------|--------------------------|-----------------------------|--------------------|------------------------------|----------------------------|--------------------|---------------------------|----------------------------|-----------------------|-----------------------|------------------------|------------------------|---------------------|-----------------|---------------------|------------------------|--------------------------|--------------------------|--------------------------|-------------------------|------------------------|------------------------------|--------------------------|---------------------------|----------------------------|--------------------------|-----------------------|----------------------|---------------------------|------------------------|--------------------------------|-----------------------|-----------------------------------|---------------------------|----------------------------|---------------------------|-------|----|
| MIR156       | +                           | +                        | —                           | —                  | —                            | —                          | +                  | —                         | —                          | +                     | —                     | +                      | +                      | +                   | —               | —                   | —                      | +                        | +                        | —                        | +                       | —                      | —                            | —                        | —                         | +                          | +                        | +                     | +                    | —                         | —                      | +                              | +                     | —                                 | —                         | —                          | —                         | 17    |    |
| MIR159       | +                           | —                        | +                           | +                  | —                            | +                          | +                  | —                         | +                          | +                     | +                     | +                      | +                      | +                   | —               | +                   | +                      | +                        | —                        | —                        | +                       | +                      | —                            | —                        | —                         | +                          | +                        | +                     | +                    | —                         | —                      | +                              | —                     | +                                 | +                         | +                          | +                         | 27    |    |
| MIR160       | +                           | +                        | —                           | —                  | +                            | +                          | +                  | —                         | +                          | +                     | +                     | —                      | +                      | +                   | +               | +                   | +                      | +                        | +                        | —                        | +                       | —                      | +                            | +                        | —                         | +                          | +                        | +                     | +                    | +                         | +                      | +                              | —                     | +                                 | +                         | +                          | —                         | 28    |    |
| MIR164       | +                           | +                        | +                           | —                  | —                            | +                          | +                  | +                         | +                          | +                     | +                     | +                      | +                      | +                   | +               | +                   | +                      | +                        | +                        | —                        | —                       | —                      | +                            | —                        | —                         | +                          | +                        | +                     | +                    | +                         | +                      | +                              | +                     | —                                 | —                         | +                          | —                         | 28    |    |
| MIR167       | +                           | +                        | +                           | —                  | —                            | +                          | +                  | +                         | +                          | +                     | +                     | +                      | +                      | +                   | +               | +                   | +                      | +                        | +                        | —                        | —                       | —                      | —                            | —                        | +                         | +                          | +                        | +                     | +                    | +                         | —                      | +                              | +                     | —                                 | —                         | +                          | —                         | 26    |    |
| MIR169       | +                           | +                        | +                           | —                  | —                            | +                          | +                  | +                         | +                          | +                     | +                     | +                      | +                      | +                   | +               | +                   | +                      | +                        | +                        | —                        | +                       | +                      | —                            | +                        | —                         | +                          | +                        | +                     | +                    | +                         | +                      | +                              | +                     | +                                 | —                         | +                          | +                         | —     | 30 |
| MIR171       | +                           | +                        | —                           | —                  | —                            | +                          | +                  | —                         | +                          | —                     | +                     | +                      | +                      | +                   | +               | +                   | +                      | +                        | +                        | —                        | +                       | —                      | —                            | —                        | +                         | +                          | +                        | +                     | +                    | +                         | —                      | +                              | +                     | —                                 | —                         | +                          | +                         | —     | 24 |
| MIR395       | —                           | +                        | —                           | —                  | —                            | —                          | —                  | —                         | —                          | —                     | —                     | +                      | +                      | +                   | —               | +                   | +                      | +                        | +                        | —                        | —                       | —                      | —                            | —                        | —                         | —                          | +                        | +                     | +                    | +                         | —                      | —                              | +                     | —                                 | —                         | —                          | —                         | 12    |    |
| MIR397       | +                           | +                        | +                           | —                  | —                            | +                          | +                  | —                         | +                          | +                     | +                     | +                      | —                      | +                   | +               | +                   | +                      | +                        | —                        | —                        | +                       | —                      | —                            | —                        | +                         | +                          | +                        | +                     | +                    | —                         | —                      | —                              | +                     | +                                 | —                         | —                          | —                         | —     | 21 |
| MIR398       | +                           | +                        | +                           | +                  | —                            | +                          | +                  | +                         | +                          | —                     | +                     | +                      | +                      | +                   | +               | +                   | +                      | +                        | +                        | —                        | +                       | —                      | —                            | —                        | —                         | +                          | +                        | +                     | +                    | +                         | +                      | +                              | +                     | +                                 | —                         | +                          | —                         | +     | 28 |
| MIR399       | +                           | +                        | +                           | —                  | —                            | +                          | +                  | +                         | +                          | +                     | +                     | +                      | +                      | +                   | +               | +                   | +                      | +                        | —                        | +                        | +                       | —                      | —                            | —                        | +                         | +                          | +                        | +                     | +                    | —                         | +                      | +                              | +                     | +                                 | —                         | —                          | +                         | —     | 27 |
| MIR408       | +                           | +                        | +                           | +                  | +                            | +                          | +                  | —                         | +                          | —                     | +                     | +                      | +                      | +                   | +               | +                   | +                      | +                        | +                        | —                        | +                       | —                      | +                            | +                        | +                         | +                          | +                        | —                     | +                    | +                         | +                      | +                              | —                     | +                                 | +                         | +                          | —                         | +     | 30 |
| MIR444       | —                           | —                        | —                           | —                  | —                            | —                          | —                  | —                         | —                          | —                     | —                     | —                      | —                      | +                   | +               | —                   | —                      | —                        | —                        | —                        | —                       | +                      | —                            | —                        | —                         | —                          | —                        | —                     | —                    | —                         | —                      | +                              | —                     | —                                 | —                         | —                          | —                         | 5     |    |
| MIR1119      | —                           | —                        | —                           | —                  | —                            | —                          | —                  | —                         | —                          | —                     | —                     | —                      | —                      | —                   | —               | —                   | —                      | +                        | —                        | —                        | —                       | —                      | —                            | —                        | —                         | —                          | —                        | —                     | —                    | —                         | —                      | —                              | —                     | —                                 | —                         | +                          | —                         | 2     |    |
| MIR1120      | —                           | —                        | —                           | —                  | —                            | —                          | —                  | —                         | —                          | —                     | —                     | —                      | —                      | —                   | —               | —                   | —                      | +                        | —                        | —                        | —                       | —                      | —                            | —                        | —                         | —                          | —                        | —                     | —                    | —                         | —                      | —                              | —                     | —                                 | —                         | —                          | —                         | 2     |    |
| MIR1122      | —                           | —                        | —                           | —                  | —                            | —                          | —                  | —                         | —                          | —                     | —                     | —                      | —                      | —                   | —               | —                   | —                      | +                        | —                        | —                        | —                       | —                      | —                            | —                        | —                         | —                          | —                        | —                     | —                    | —                         | —                      | —                              | +                     | —                                 | —                         | +                          | —                         | 3     |    |
| MIR1139      | —                           | —                        | —                           | —                  | —                            | —                          | —                  | —                         | —                          | —                     | —                     | —                      | —                      | —                   | —               | —                   | —                      | +                        | —                        | —                        | —                       | —                      | —                            | —                        | —                         | —                          | —                        | —                     | —                    | —                         | —                      | —                              | +                     | —                                 | —                         | —                          | —                         | 2     |    |
| MIR5050      | —                           | —                        | —                           | —                  | —                            | —                          | —                  | —                         | —                          | —                     | —                     | —                      | —                      | —                   | —               | —                   | —                      | +                        | —                        | —                        | —                       | +                      | —                            | —                        | —                         | —                          | —                        | —                     | —                    | —                         | —                      | —                              | —                     | —                                 | —                         | —                          | —                         | —     | 2  |
| MIR5062      | —                           | —                        | —                           | —                  | —                            | —                          | —                  | —                         | —                          | —                     | —                     | —                      | —                      | —                   | —               | —                   | —                      | +                        | +                        | —                        | —                       | —                      | —                            | —                        | —                         | —                          | —                        | —                     | —                    | —                         | —                      | +                              | —                     | —                                 | —                         | —                          | —                         | 3     |    |
| MIR5067      | —                           | —                        | —                           | —                  | —                            | —                          | —                  | —                         | —                          | —                     | —                     | —                      | —                      | —                   | —               | —                   | —                      | —                        | —                        | —                        | —                       | —                      | —                            | —                        | —                         | —                          | —                        | —                     | —                    | —                         | —                      | —                              | +                     | —                                 | —                         | —                          | —                         | 1     |    |



**Table S3.** Description, expression and putative target genes of known miRNAs in roots whose expression were unchanged in Suntop (ST) but up-regulated in Sunmate (SM), or down-regulated in ST but up-regulated or unchanged in SM treated with 100 mM NaCl for 1 day (100 mM NaCl vs control).

| Family name | miRNA name                  | Sequence              | Length (nt) | Fold change [1] |       | Target gene          | Annotation                                   |
|-------------|-----------------------------|-----------------------|-------------|-----------------|-------|----------------------|----------------------------------------------|
|             |                             |                       |             | ST              | SM    |                      |                                              |
| MIR156      | Tae-miR156                  | UGACAGAAGAGAGUGAGCACA | 21          | -1.28           | -0.73 | TraesCS2A01G350100.1 | Nitrate transporter 1.2                      |
|             |                             |                       |             |                 |       | TraesCS2B01G368600.1 |                                              |
|             |                             |                       |             |                 |       | TraesCS2B01G368600.2 |                                              |
|             |                             |                       |             |                 |       | TraesCS2D01G348500.1 | protein NRT1/ PTR FAMILY 4.6-like isoform X1 |
|             |                             |                       |             |                 |       | TraesCS2D01G348500.2 |                                              |
|             |                             |                       |             |                 |       | TraesCS2D01G348500.3 |                                              |
|             |                             |                       |             |                 |       | TraesCS6A01G110100.2 | squamosa promoter-binding-like protein 3     |
|             |                             |                       |             |                 |       | TraesCS6B01G138400.1 |                                              |
|             |                             |                       |             |                 |       | TraesCS6D01G098500.1 |                                              |
| MIR159      | tae-miR159a,<br>tae-miR159b | UUUGGAUUGAAGGGAGCUCUG | 21          | -0.39           | 1.92  | TraesCS6D01G145200.1 | squamosa promoter-binding-like protein 4     |
|             |                             |                       |             |                 |       | TraesCS6D01G145200.1 |                                              |
|             |                             |                       |             |                 |       | TraesCS3A01G131700.1 | protein SPEAR2                               |
|             |                             |                       |             |                 |       | TraesCS3A01G131700.3 |                                              |
|             |                             |                       |             |                 |       | TraesCS3D01G147900.1 |                                              |
|             |                             |                       |             |                 |       | TraesCS3D01G147900.2 | transcription factor GAMYB                   |
|             |                             |                       |             |                 |       | TraesCS3A01G336500.1 |                                              |
|             |                             |                       |             |                 |       | TraesCS3D01G329400.1 |                                              |
|             |                             |                       |             |                 |       | TraesCS3D01G329400.2 |                                              |

| Family name | miRNA name  | Sequence              | Length (nt) | Fold change [1] |       | Target gene          | Annotation                                           |
|-------------|-------------|-----------------------|-------------|-----------------|-------|----------------------|------------------------------------------------------|
|             |             |                       |             | ST              | SM    |                      |                                                      |
|             |             |                       |             |                 |       | TraesCS3D01G329400.3 |                                                      |
|             |             |                       |             |                 |       | TraesCS3B01G367500.1 | R2R3-MYB protein                                     |
|             |             |                       |             |                 |       | TraesCS3B01G367500.2 |                                                      |
| MIR160      | tae-miR160  | UGCCUGGCUCCCUGUAUGCCA | 21          | -1.42           | 1.58  | TraesCS2A01G380300.1 | auxin response factor 8-like                         |
|             |             |                       |             |                 |       | TraesCS2B01G397300.1 |                                                      |
|             |             |                       |             |                 |       | TraesCS4B01G346200.1 | protein FIZZY-RELATED 2-like                         |
|             |             |                       |             |                 |       | TraesCS4B01G346200.2 |                                                      |
|             |             |                       |             |                 |       | TraesCS4D01G341200.1 |                                                      |
| MIR171      | tae-miR171a | UGAUUGAGCCGUGCCAAUAUC | 21          | -2.46           | 1.46  | TraesCS1A01G209400.1 | Scarecrow-like protein 6                             |
|             |             |                       |             |                 |       | TraesCS1B01G223400.1 |                                                      |
|             |             |                       |             |                 |       | TraesCS1D01G212800.1 |                                                      |
|             | tae-miR171b | UUGAGCCGUGCCAAUAUCACG | 21          | -1.03           | -0.89 | TraesCS6A01G247200.1 | Scarecrow protein 6                                  |
|             |             |                       |             |                 |       | TraesCS6B01G277400.1 |                                                      |
|             |             |                       |             |                 |       | TraesCS6D01G229400.1 |                                                      |
|             |             |                       |             |                 |       | TraesCS2A01G352600.1 | 6,7-dimethyl-8-ribyllumazine synthase, chloroplastic |
|             |             |                       |             |                 |       | TraesCS2B01G371700.1 |                                                      |
|             |             |                       |             |                 |       | TraesCS2D01G351600.1 |                                                      |
| MIR395      | tae-miR395b | UGAAGUGUUUGGGGGAACUC  | 20          | -1.29           | -0.16 | TraesCS5A01G382900.1 | ATP sulfurylase                                      |
|             | tae-miR395a | GUGAAGUGUUUGGGGGAACUC | 21          | -0.45           | 3.49  | TraesCS5B01G387300.1 | ATP sulfurylase 4,                                   |
|             |             |                       |             |                 |       | TraesCS5D01G392300.1 | chloroplastic-like                                   |



| Family name | miRNA name      | Sequence                | Length (nt) | Fold change [1] |      | Target gene          | Annotation                                          |         |
|-------------|-----------------|-------------------------|-------------|-----------------|------|----------------------|-----------------------------------------------------|---------|
|             |                 |                         |             | ST              | SM   |                      |                                                     |         |
| MIR818      | tae-miR1130b-3p | UCUUAUAUUAUGGGACGGAGG   | 21          | -0.22           | 1.09 | TraesCS2D01G248200.6 | Inactive leucine-rich repeat receptor-like kinase   | protein |
|             |                 |                         |             |                 |      | TraesCS2A01G366400.1 | hypothetical OsI_25001                              | protein |
|             |                 |                         |             |                 |      | TraesCS2A01G366400.2 | hypothetical F775_04208                             | protein |
| MIR5048     | tae-miR5048-5p  | UUUGCAGGUUUUAGGUCUAAGU  | 22          | -0.72           | 1.24 | TraesCS3A01G521100.1 | uncharacterized LOC109783670                        | protein |
|             |                 |                         |             |                 |      | TraesCS3A01G521100.2 |                                                     |         |
|             |                 |                         |             |                 |      | TraesCS4B01G313900.2 |                                                     |         |
|             |                 |                         |             |                 |      | TraesCS4B01G313900.3 |                                                     |         |
|             |                 |                         |             |                 |      | TraesCS1B01G119300.3 | starch synthase III                                 |         |
|             |                 |                         |             |                 |      | TraesCS7D01G487800.1 | GDSL esterase/lipase                                |         |
| MIR5062     | tae-miR5062-5p  | UGAACCUUAGGGAACAGCCGCAU | 23          | -0.77           | 1.34 |                      |                                                     |         |
| MIR5067     | tae-miR5175-5p  | UUCCAAUUACUCGUCGUGGU    | 21          | -0.32           | 1.4  | TraesCS2A01G485700.2 | receptor-like serine/threonine-protein kinase SD1-8 |         |
| MIR5200     | tae-miR5200     | UGUAGAUACUCCCUAAGGCUU   | 21          | -0.09           | 1.20 | TraesCS5D01G072900.1 | hypothetical F775_12042                             | protein |
| MIR7757     | tae-miR7757-5p  | AUAAAACCUUCAGCUAUCCAUC  | 22          | -1.10           | 1.78 | TraesCS2A01G023400.1 | putative disease resistance protein At1g50180       |         |
|             |                 |                         |             |                 |      | TraesCS2B01G033500.1 |                                                     |         |
|             |                 |                         |             |                 |      | TraesCS2D01G024500.1 |                                                     |         |
|             |                 |                         |             |                 |      | TraesCS2D01G024500.2 |                                                     |         |

| Family name | miRNA name                          | Sequence               | Length (nt) | Fold change [1] |      | Target gene                                                                                                                                                                                  | Annotation                                    |                    |
|-------------|-------------------------------------|------------------------|-------------|-----------------|------|----------------------------------------------------------------------------------------------------------------------------------------------------------------------------------------------|-----------------------------------------------|--------------------|
|             |                                     |                        |             | ST              | SM   |                                                                                                                                                                                              |                                               |                    |
| MIR9652     | tae-miR9652-5p                      | CCUGUUUGUCAUUAAGUUUCUU | 22          | -0.54           | 1.41 | TraesCS3B01G287600.2<br>TraesCS5B01G451400.1<br>TraesCS5B01G452500.1                                                                                                                         | protein MEL1                                  | argonaute          |
| MIR9653     | tae-miR9653b                        | UGGCCAAGGUCUCUUGAGGCU  | 21          | -1.07           | 1.80 | TraesCS1A01G228200.1<br>TraesCS1A01G228200.2                                                                                                                                                 | probable phosphatase 2C                       | protein 48         |
| MIR9654     | tae-miR9654b-3p                     | UUCCGAAAGGCUUGAAGCGAAU | 22          | -0.9            | 2.18 | -                                                                                                                                                                                            | -                                             |                    |
| MIR9656     | tae-miR9656-3p                      | CUUCGAGACUCUGAACAGCGG  | 21          | -0.17           | 1.72 | -                                                                                                                                                                                            | -                                             |                    |
| MIR9657     | tae-miR9657a-3p                     | UGUGCUUCCUCGUCGAACGGU  | 21          | -0.31           | 1.27 | TraesCS3B01G280400.1<br>TraesCS3D01G251300.1<br>TraesCS3A01G250900.2<br>TraesCS7B01G144300.1<br>TraesCS7B01G006500.1<br>TraesCS7D01G103400.1<br>TraesCS3A01G250900.3<br>TraesCS3A01G250900.1 | WD-40 repeat-containing protein MSI4 isoforms |                    |
|             | tae-miR9657c-3p,<br>tae-miR9657b-3p | CGUGCUUCCUCGUCGAACGGU  | 21          | -0.38           | 1.16 | TraesCS3B01G280400.1<br>TraesCS3D01G251300.1<br>TraesCS3A01G250900.2<br>TraesCS7B01G006500.1<br>TraesCS7D01G103400.1                                                                         | WD-40 repeat-containing protein MSI4 isoforms | putative serpin-Z5 |

| Family name | miRNA name       | Sequence               | Length (nt) | Fold change [1] |       | Target gene          | Annotation                                   |
|-------------|------------------|------------------------|-------------|-----------------|-------|----------------------|----------------------------------------------|
|             |                  |                        |             | ST              | SM    |                      |                                              |
|             | tae-miR9662b-3p  | UGAACAUCCCAGAGCCACCGG  | 21          | -0.09           | 1.45  | TraesCS7B01G144300.1 | MYB-related protein                          |
|             |                  |                        |             |                 |       | TraesCS3A01G250900.1 | FVE [ <i>Triticum aestivum</i> ]             |
|             |                  |                        |             |                 |       | TraesCS3A01G250900.3 |                                              |
|             |                  |                        |             |                 |       | TraesCS6B01G021800.1 | uncharacterized protein LOC109765037         |
|             |                  |                        |             |                 |       | TraesCS6B01G043100.1 |                                              |
| MIR9664     | tae-miR9664-3p   | UUGCAGUCCUCGAUGUCGUAG  | 21          | -0.64           | 1.04  | TraesCS6D01G035100.1 | cytosolic sulfotransferase 5-like            |
|             |                  |                        |             |                 |       | TraesCS3A01G247700.1 | cyclin dependent protein kinase              |
|             |                  |                        |             |                 |       | TraesCS7D01G096000.1 | disease resistance protein                   |
|             |                  |                        |             |                 |       | TraesCS5D01G405600.1 |                                              |
| MIR9666     | tae-miR9666a-3p  | CGGUAGGGCUGUAUGAUGGCGA | 22          | -1.71           | -0.69 | TraesCS2D01G541000.1 |                                              |
|             |                  |                        |             |                 |       | TraesCS5B01G438300.1 | BTB/POZ and MATH domain-containing protein 3 |
|             |                  |                        |             |                 |       |                      |                                              |
|             | tae-miR9666c-5p, | GCCAUCAUACGUCCAACCGUG  | 21          | -2.43           | -0.69 | TraesCS2B01G562600.1 | exocyst complex                              |
|             | tae-miR9666b-5p  |                        |             |                 |       |                      | component EXO70A1-like                       |
| MIR9668     | tae-miR9668-5p   | CCAAUGACAAGUAUUUUCGGA  | 21          | -0.28           | 1.75  | TraesCS6B01G070200.1 | disease resistance protein RGA2-like         |
| MIR9669     | tae-miR9669-5p   | UACUGUGGGCACUUAUUUGAC  | 21          | -0.72           | 2.13  | -                    | -                                            |
| MIR9672     | tae-miR9672b     | UACCACGACUGUCAUUAAGCA  | 21          | -1.12           | -0.57 | TraesCS7D01G383200.1 | replication factor C subunit 1               |

| Family name | miRNA name      | Sequence                 | Length (nt) | Fold change [1] |      | Target gene          | Annotation                      |                |
|-------------|-----------------|--------------------------|-------------|-----------------|------|----------------------|---------------------------------|----------------|
|             |                 |                          |             | ST              | SM   |                      |                                 |                |
| MIR9674     | tae-miR9674b-5p | AUAGCAUCAUCCAUCCUACCC    | 21          | -0.08           | 1.48 |                      |                                 |                |
|             |                 |                          |             |                 |      | TraesCS2A01G531000.1 | protein                         | Rf1,           |
|             |                 |                          |             |                 |      | TraesCS6A01G014800.1 | mitochondrial-like              |                |
|             |                 |                          |             |                 |      | TraesCS6B01G021600.1 |                                 |                |
|             |                 |                          |             |                 |      | TraesCS6D01G017700.1 |                                 |                |
| MIR9675     | tae-miR9675-3p  | UUUAUGAUCACUCUCGUUUUG    | 21          | -0.21           | 2.48 | TraesCS3A01G074300.1 | premnaspirodiene oxygenase-like |                |
| MIR9772     | tae-miR9772     | UGAGAUGAGAUUACCCCAUAC    | 21          | -0.58           | 1.7  | TraesCS6A01G063700.1 | F-box protein                   | At5g03970-like |
|             |                 |                          |             |                 |      | TraesCS6B01G085300.1 |                                 |                |
|             |                 |                          |             |                 |      | TraesCS6B01G085300.2 |                                 |                |
|             |                 |                          |             |                 |      | TraesCS7D01G005400.1 | F-box/kelch-repeat protein      | At3g61590-like |
|             |                 |                          |             |                 |      | TraesCS6A01G058900.1 |                                 |                |
| MIR9773     | tae-miR9773     | UUUGUUUUUAUGUUAUUUUGUGAA | 24          | -0.39           | 2.63 | -                    | -                               |                |
| MIR9775     | tae-miR9775     | UGUGCGCAAUAAGAUUUUGCUA   | 22          | 0.46            | 1.97 | TraesCS7D01G005400.1 | F-box/kelch-repeat protein      | SKIP11         |

<sup>[1]</sup> Fold change (NaCl vs control) is  $\log_2 N$ ,  $\log_2 N \geq 1$  are up-regulated, between  $0 < |\log_2 N| < 1$  are unchanged and  $\log_2 N \leq -1$  are down-regulated,  $P$ -values 0.01 and  $Q$ -value  $\leq 0.001$ .

**Table S4.** Description, expression and putative target genes of known miRNAs in roots whose expression were unchanged in Suntop (ST) but down-regulated in Sunmate (SM), or up-regulated in ST but down-regulated or unchanged in SM treated with 100 mM NaCl for 1 day.

| miRNA family | miRNA name | Sequence              | Length (nt) | Fold change [1] |       | Target gene          | Annotation    |        |
|--------------|------------|-----------------------|-------------|-----------------|-------|----------------------|---------------|--------|
|              |            |                       |             | ST              | SM    |                      |               |        |
| MIR319       | tae-miR319 | UUGGACUGAAGGGAGCUCCCU | 21          | -0.21           | -2.97 | TraesCS3D01G146900.1 | transcription | factor |
|              |            |                       |             |                 |       | TraesCS3A01G140100.1 | PCF5-like     |        |

| miRNA family | miRNA name      | Sequence                     | Length (nt) | Fold change [1] |       | Target gene                                                                                                                                                          | Annotation                         |
|--------------|-----------------|------------------------------|-------------|-----------------|-------|----------------------------------------------------------------------------------------------------------------------------------------------------------------------|------------------------------------|
|              |                 |                              |             | ST              | SM    |                                                                                                                                                                      |                                    |
| MIR397       | tae-miR397-5p   | UCACCGGCGCUGCACACAAUG        | 21          | 1.76            | -0.69 | TraesCS7A01G047900.1                                                                                                                                                 | probable protein phosphatase 2C 37 |
| MIR1117      | tae-miR1117     | UAGUACCGGUUCGUGGCACGA        | 24          | -0.32           | -1.47 |                                                                                                                                                                      |                                    |
| MIR1125      | tae-miR1125     | ACC                          | 24          | 0.28            | -2.41 |                                                                                                                                                                      |                                    |
|              | tae-miR1137a    | AACCAACGAGACCAACUGCGG<br>CGG | 20          | 0.25            | -1.53 | TraesCS6A01G107500.1<br>TraesCS6B01G136100.1<br>TraesCS6B01G136200.1                                                                                                 | unnamed protein product            |
| MIR9652      | tae-miR9652-3p  | AAGCUUAAUGAGAACAUGUG         | 20          | 1.24            | 0     |                                                                                                                                                                      |                                    |
| MIR9658      | tae-miR9658-3p  | AUCGUUCUGGGUGAAUAGGCC        | 21          | -0.25           | -2.03 |                                                                                                                                                                      |                                    |
| MIR9672      | tae-miR9672a-3p | CCACGACUGUCAUUAAGCAUC        | 21          | 0.65            | -1.02 |                                                                                                                                                                      |                                    |
| MIR9778      | tae-miR9778     | UGCAUCAUCUGAACUCGUCG         | 21          | -0.62           | -2    | TraesCS1A01G021700.1<br>TraesCS1A01G021800.1<br>TraesCS1A01G021800.2<br>TraesCS1B01G025500.1<br>TraesCS1B01G027000.1<br>TraesCS1B01G027500.1<br>TraesCS1B01G027500.2 | Disease resistance protein RPM1    |

<sup>[1]</sup> Fold change (NaCl vs control) is  $\log_2 N$ ,  $\log_2 N \geq 1$  are up-regulated, between  $0 < |\log_2 N| < 1$  are unchanged and  $\log_2 N \leq -1$  are down-regulated,  $P$ -values 0.01 and  $Q$ -value  $\leq 0.001$ .

**Table S5.** Description, expression and putative target genes of novel miRNAs in roots whose expression were unchanged in Suntop (ST) but up-regulated in Sunmate (SM), or down-regulated in ST but up-regulated (-) or unchanged in SM treated with 100 mM NaCl for 1 day

| miRNA name  | Sequence                       | Length (nt) | Fold change [1] |       | Target gene                                  | Annotation                      |
|-------------|--------------------------------|-------------|-----------------|-------|----------------------------------------------|---------------------------------|
|             |                                |             | ST              | SM    |                                              |                                 |
| novel_mir8  | UCCCGGCCCGAACCUGUCGGCU         |             | -<br>0.37       | 1.17  | TraesCS6A01G114800.1<br>TraesCS6B01G142400.1 | premnaspirodiene oxygenase-like |
| novel_mir14 | AGAGAUCCCGCGCGCUACUCCGUCG<br>A | 26          | -<br>1.53       | -0.49 |                                              |                                 |
| novel_mir16 | CUUGAAGACUUUGGCCACGUCCAU       | 24          | -<br>1.69       | -0.68 |                                              |                                 |
| novel_mir17 | ACCUUUGAGACUUUGGCCAUGGCC<br>A  | 25          | -<br>1.83       | -0.94 |                                              |                                 |

| miRNA name  | Sequence                        | Length (nt) | Fold change [1] |       | Target gene          | Annotation                                       |
|-------------|---------------------------------|-------------|-----------------|-------|----------------------|--------------------------------------------------|
|             |                                 |             | ST              | SM    |                      |                                                  |
| novel_mir18 | UUGAAGACUUUGGCCAUGUCCAUGGUG     | 27          | -1.34           | -0.99 |                      |                                                  |
| novel_mir24 | AUGGGCUACGUGUGUUAAC             | 20          | -2.3            | -0.69 |                      |                                                  |
|             |                                 |             | 2.34            |       |                      |                                                  |
| novel_mir28 | ACUGGUUGGAUCAUGCUUCUGUUUAUGA    | 26          | -0.87           | 1.38  | TraesCS1D01G090600.1 | putative disease resistance RPP13-like protein 3 |
|             |                                 |             |                 |       | TraesCS6B01G387200.1 | Disease resistance protein RPM1                  |
| novel_mir32 | UGUUUGGUGCGGACUCUGGACCU         | 23          | -1.23           | -0.96 |                      |                                                  |
| novel_mir33 | AAGAACAUCUAAGGGGCUGAGUUG        | 24          | -1.56           | -0.23 |                      |                                                  |
| novel_mir34 | AAAAUGAUGUGUUGUGGAAAGCA         | 23          | -1.91           | 1.87  |                      |                                                  |
| novel_mir36 | UUGGCGAUAGCGAAUGCAGUUCUC        | 24          | -2.31           | -0.16 |                      |                                                  |
| novel_mir40 | GUGCACCCGUGUUCACCUUUGUAUUU      | 26          | -0.28           | 1.93  |                      |                                                  |
| novel_mir45 | UGAUUAACGGCCAGGAUUUCCCUG        | 24          | -0.13           | 1.12  |                      |                                                  |
| novel_mir48 | AUGGAUCUGACGGCUGUAGAGGA         | 23          | -0.43           | 1.16  |                      |                                                  |
| novel_mir49 | GUGAUUAACGGCCAGGAUUUCCCU G      | 25          | -2.18           | 1.67  |                      |                                                  |
| novel_mir56 | GGCCGCUGCACUCCUUGGCCGCUUGGCG    | 28          | -2.19           | -0.85 |                      |                                                  |
| novel_mir59 | AUAUUUGCAGGUUUUAGGUCUAAGUGA     | 27          | -0.27           | 1.54  | TraesCS6B01G465600.1 | CBL-interacting serine/threonine-                |
|             |                                 |             |                 |       | TraesCS6B01G465600.2 | protein kinase 7-like                            |
| novel_mir60 | GUGCUAGAUAUCCACGCCCGGUUCAGUGUUG | 30          | -2.32           | -0.65 |                      |                                                  |
| novel_mir61 | AACGGCCAGGAUUCGUCUGAU           | 21          | -1.29           | 0.13  | TraesCS4A01G480100.1 | putative disease resistance RPP13-like protein 1 |

| miRNA name  | Sequence             | Length (nt) | Fold change [1] |       | Target gene | Annotation |
|-------------|----------------------|-------------|-----------------|-------|-------------|------------|
|             |                      |             | ST              | SM    |             |            |
| novel_mir64 | ACACUACGCGUGGAUGAGCA | 20          | -               | -0.91 |             |            |
|             |                      |             | 3.24            |       |             |            |

<sup>[1]</sup> Fold change (NaCl vs control) is  $\log_2 N$ ,  $\log_2 N \geq 1$  are up-regulated, between  $0 < |\log_2 N| < 1$  are unchanged and  $\log_2 N \leq -1$  are down-regulated,  $P$ -values 0.01 and  $Q$ -value  $\leq 0.001$ .

**Table S6.** Description, expression and putative target genes of novel miRNAs in roots whose expression were unchanged in Suntop (ST) but down-regulated (-) in Sunmate (SM), or up-regulated in ST but down-regulated or unchanged in SM treated with 100 mM NaCl for 1 day

| miRNA name  | Sequence                         | Length (nt) | Fold change [1] |       | Target gene                                                                                  | Annotation                                                 |
|-------------|----------------------------------|-------------|-----------------|-------|----------------------------------------------------------------------------------------------|------------------------------------------------------------|
|             |                                  |             | ST              | SM    |                                                                                              |                                                            |
| novel_mir9  | UUUGAAGACUAGUUU AUUAU AU         | 22          | -0.36           | -2    |                                                                                              |                                                            |
| novel_mir11 | ACGCAUCAUUCAA AUUCUGCCCUAUC A    | 28          | -0.23           | -1.42 |                                                                                              |                                                            |
| novel_mir19 | UCCACAGUGCAA AUUUAAA AUUU AUUAGA | 30          | -0.45           | -1.01 |                                                                                              |                                                            |
| novel_mir23 | AGCACCGUUGGCAUCAUCGUCGGCGUUGUC   | 30          | -0.57           | -1.16 |                                                                                              |                                                            |
| novel_mir25 | UUGGGUUCGAGCCCCAAGGUGGG          | 23          | 1.69            | 0.98  |                                                                                              |                                                            |
| novel_mir29 | AGUUCGAGUCGGAGGCCACGGUGCUGGG     | 28          | -0.33           | -1.47 |                                                                                              |                                                            |
| novel_mir30 | UUGUUUGGCCAUCAAGAACA AUAGUAG     | 27          | -0.36           | -1.32 |                                                                                              |                                                            |
| novel_mir31 | AUCGAGAA AUUGGAGCUCGGUGCAGGCAUA  | 30          | -0.62           | -1.39 |                                                                                              |                                                            |
| novel_mir37 | AAGUUGCGUAGUGGAUCGCUUGGGGCCUA    | 29          | -0.78           | -1.18 |                                                                                              |                                                            |
| novel_mir46 | GCGGCGACGGGGGCGGCUU              | 19          | 3.21            | -1.39 |                                                                                              |                                                            |
| novel_mir53 | CCGGAUGUGUUGUCUUCUCGACCAUGGUG    | 30          | -0.01           | -1.3  |                                                                                              |                                                            |
| novel_mir57 | UGGGCCUCACGGUCCAUA AU            | 20          | -0.17           | -1.12 | TraesCS2D01G386500.1<br>TraesCS6B01G142400.1<br>TraesCS5B01G183100.1<br>TraesCS5D01G190100.1 | Formin-like protein 3<br>UDP-glycosyltransferase 90A1-like |
| novel_mir58 | CGAAGCGGCGCUCGGCCCCGG            | 21          | -0.56           | -1.81 | TraesCS4B01G062900.1<br>TraesCS4D01G061900.1                                                 | polyol transporter 5-like                                  |
| novel_mir66 | UCUAGAGGAUGCAGUCU UCCUCAAGG      | 27          | -0.79           | -2.2  |                                                                                              |                                                            |
| novel_mir68 | GACCGUACCCCAAACCGACA             | 20          | 0.34            | -1.53 |                                                                                              |                                                            |

| miRNA name  | Sequence                      | Length<br>(nt) | Fold change [1] |       | Target gene                                                          | Annotation                               |
|-------------|-------------------------------|----------------|-----------------|-------|----------------------------------------------------------------------|------------------------------------------|
|             |                               |                | ST              | SM    |                                                                      |                                          |
| novel_mir75 | CCAUCGUCGGCACGGCCGGUACCCACGCG | 29             | 1.19            | -4.75 | TraesCS5A01G555600.1<br>TraesCS7D01G119200.1<br>TraesCS5D01G023700.1 | hypothetical<br>MTR_0021s0160<br>protein |

<sup>[1]</sup> Fold change (NaCl vs control) is log<sub>2</sub>N, log<sub>2</sub>N ≥ 1 are up-regulated, between 0 < |log<sub>2</sub>N| < 1 are unchanged and log<sub>2</sub>N ≤ -1 are down-regulated, P-values 0.01 and Q-value ≤ 0.001.



**Table S7. List of gene specific primers used in qRT PCR analysis**

| <b>miRNA</b>    | <b>Target gene</b>   | <b>Primers</b>                                   | <b>Amplicon size</b> |
|-----------------|----------------------|--------------------------------------------------|----------------------|
| tae-mir160      | TraesCS2B01G397300.1 | F-GGATCTCCACCTCAGCAACC<br>R-CGTGATGTTGTCGTCTTCGC | 154                  |
| tae-miR319      | TraesCS3A01G140100.1 | F-GAAGGACCGGCACAGTAAG<br>R-TCCTTGGCGTTCTTGATGAG  | 159                  |
| tae-miR397-5p   | TraesCS7A01G047900.1 | F-GAACAGATGCACACCATCTTG<br>R-ATGGGCCATCCCAATTCC  | 149                  |
| tae-mir9653b    | TraesCS1A01G228200.1 | F-GTCAAGGACTACGGCGTGAT<br>R-AATCTGTCGCTTACCCCGTC | 104                  |
| tae-miR9657a-3p | TraesCS7B01G144300.1 | F-CGATCATTGTTTGCCGGAAG<br>R-ACCCTTGTTGGTCCTCATAC | 161                  |
| tae-miR9772     | TraesCS6A01G058900.1 | F-GGCTTTCTTGCGGACATTTG<br>R-CCACCACCAATGCTTGTTTC | 141                  |
| tae-miR9778     | TraesCS1D01G021300.1 | F-GTGTGGCAAAGCAGATGAAG<br>R-ACACCGCAATCACCTAAG   | 168                  |
| Novel_mir8      | TraesCS6A01G142400.1 | F-CATCGACACAAGGGCTGGA<br>R-TCTTGGTGGTGCCTGTTTCTT | 75                   |
|                 | Actin                | F-CACTGGAATGGTCAAGGCTG<br>R-CTCCATGTCATCCCAGTTG  |                      |

**Table S8. List of miRNA primers used in qRT PCR analysis**

| <b>miRNA</b>  | <b>Primer sequence</b>        | <b>Length</b> |
|---------------|-------------------------------|---------------|
| Tae_miR156    | UGACAGAAGAGAGUGAGCACA         | 21            |
| Tae_miR171a   | UGAUUGAGCCGUGCCAAUAUC         | 21            |
| Tae_miR319    | UUGGACUGAAGGGAGCUCCCU         | 21            |
| Tae_miR395b   | UGAAGUGUUUGGGGGAACUC          | 20            |
| Tae_miR397-5p | UCACCGGCGCUGCACACAAUG         | 21            |
| Novel_miR59   | AUAUUUGCAGGUUUUAGGUCUAAGUGA   | 27            |
| Novel_miR 75  | CCAUCGUCGGCACGGCCGGUACCCACGCG | 29            |

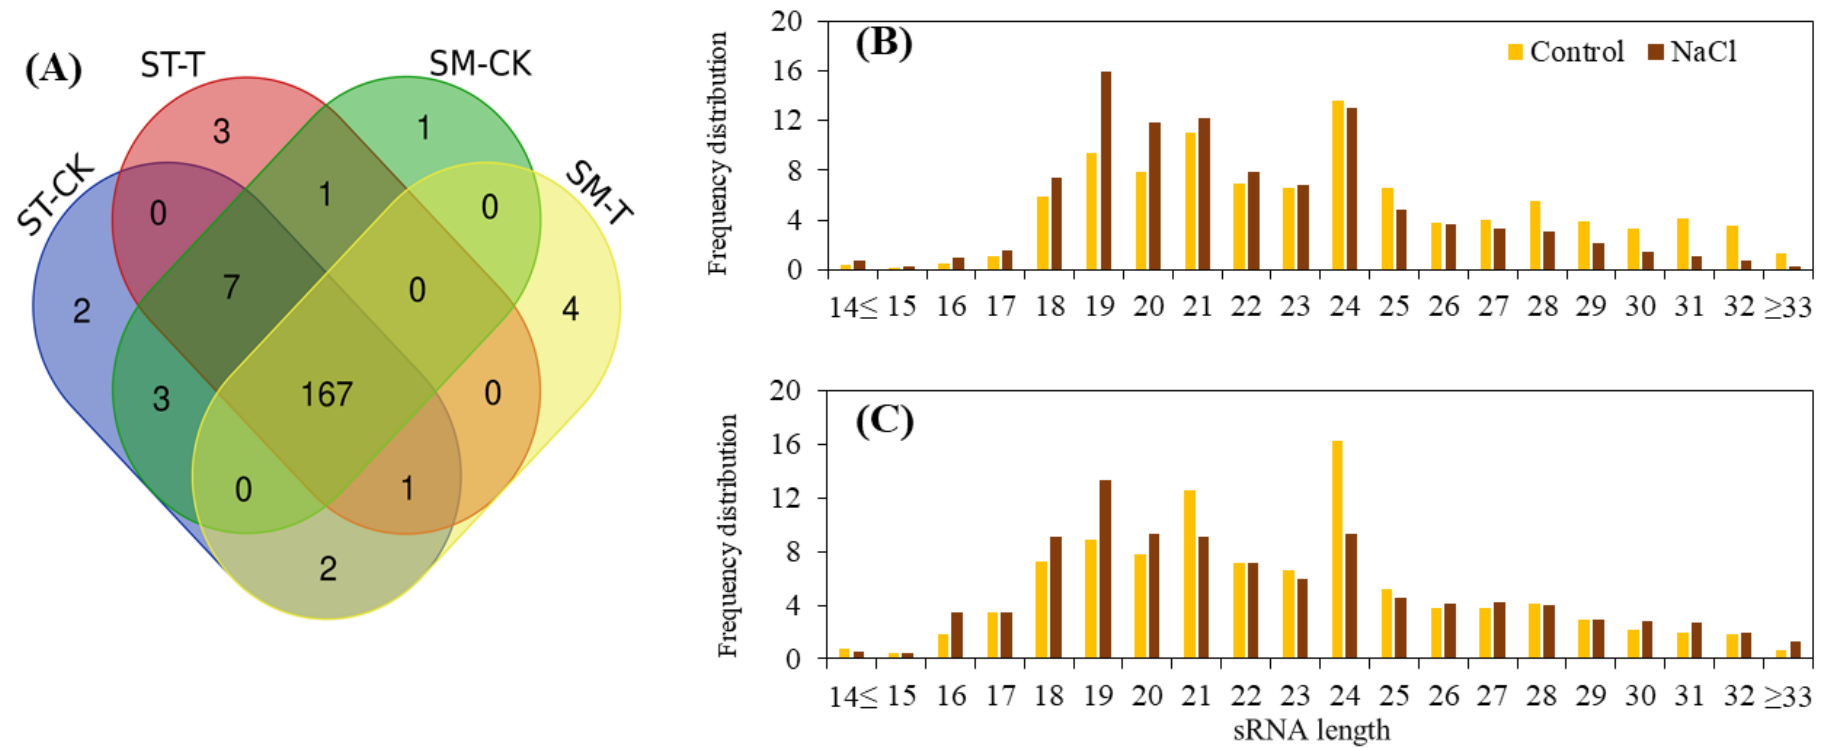

**Figure S1.** Number of miRNAs in two wheat cultivars under NaCl stress (T) and control conditions (CK) were counted in root (A). Length base distribution of total identified miRNAs in roots of two wheat cultivars (B) Suntop (ST), (C) Sunmate (SM).

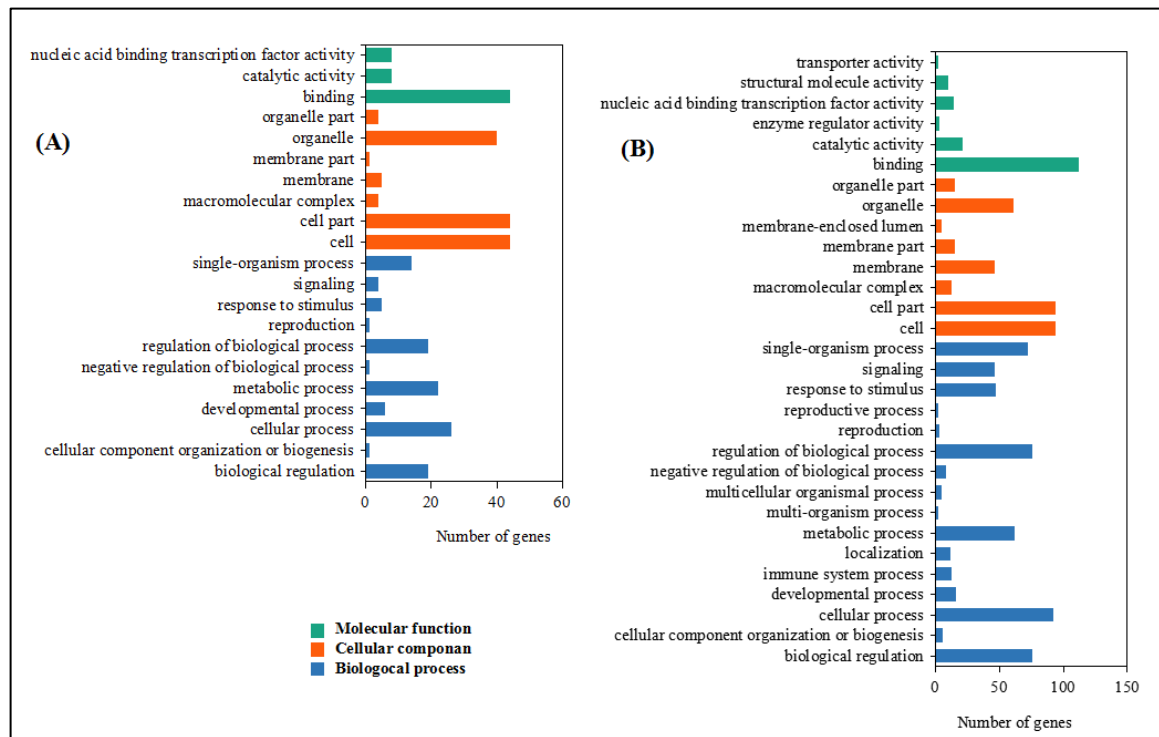

**Figure S2.** Go analysis of identified target genes in cultivar Suntop (A) and Sunmate (B). Target genes were classified into three categories: biological processes, cellular component, and molecular function. Values in the Y axis are the number of target genes in different functional categories
